# Supplementary material for: IFNγ mediates the resistance of tumor cells to distinct NK cell subsets
Source: PubMed Central journal article supplement — J Immunother Cancer. 2024 Jul 1;12(7):e009410. doi: 10.1136/jitc-2024-009410 (PMC11218003; doi:10.1136/jitc-2024-009410), 2024-07-01
Supplement: jitc-2024-009410supp001.pdf [file jitc-2024-009410supp001.pdf]

## Supplementary Figures

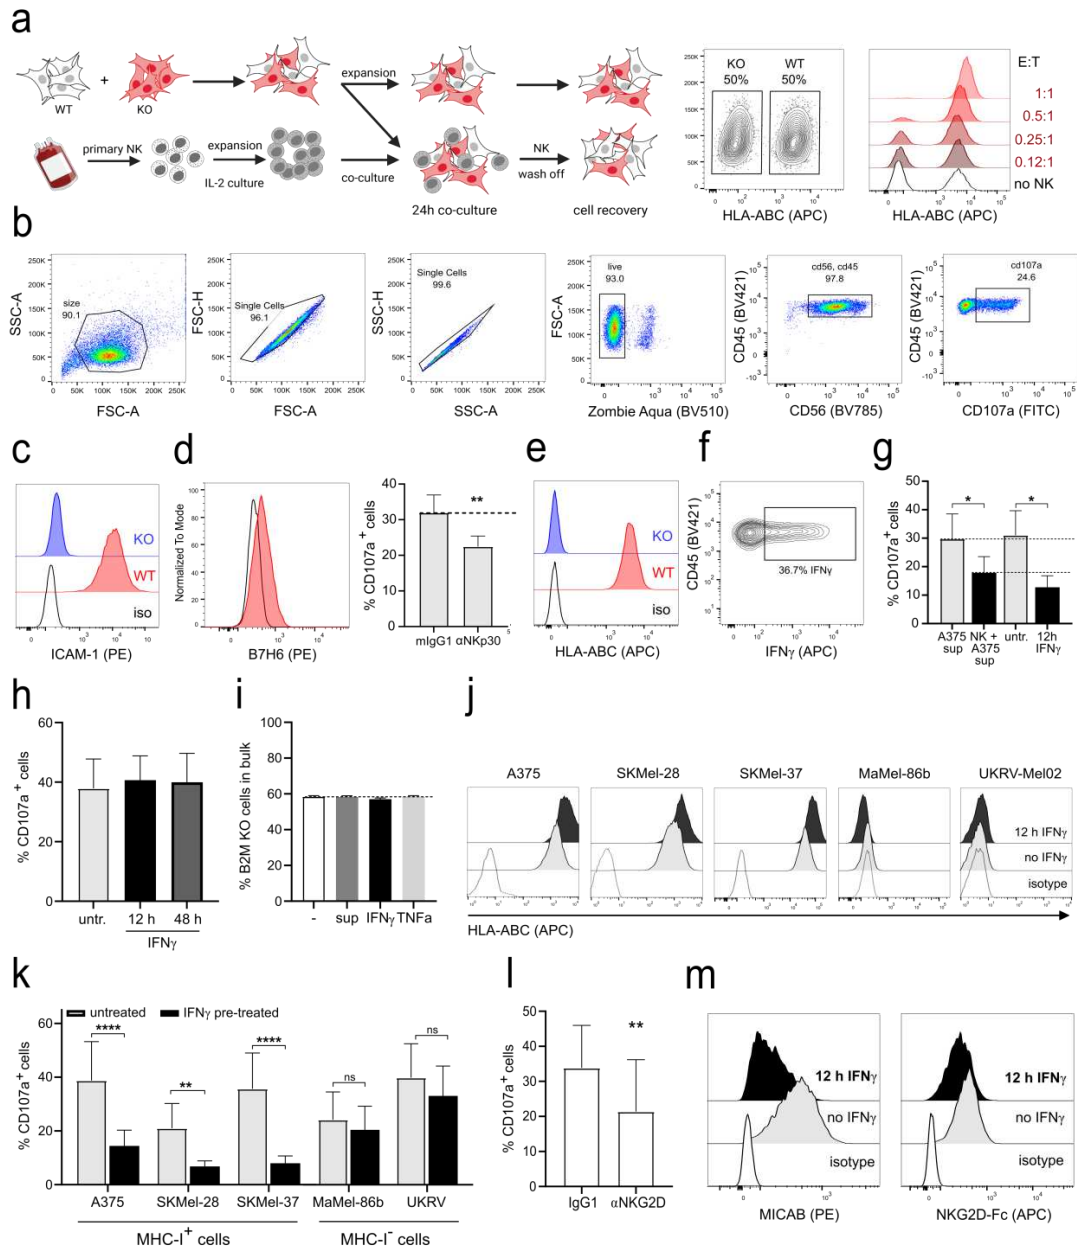

**Figure S1**

**a)** Experimental set-up mimicking the screen conditions. The ratio between WT vs KO melanoma cells was determined after 24-h co-culture with NK cells. Created with BioRender.com **b)** Representative gating strategy for detecting degranulation (CD107a) of NK cells. **c)** Expression of ICAM-1 on WT (red) and sorted ICAM-1 KO A375 cells (blue). **d)** Histogram showing the expression of B7H6 on A375 cells (left) and the degranulation of NK cells (right) after 4-h co-culture with A375 in the presence of Nkp30 blocking mAb (n=5). **e)** Expression of HLA-ABC on WT (red) and sorted B2M KO A375 cells (blue). **f)** Intracellular staining of IFN $\gamma$  in NK cells after 4-h co-culture with A375 cells. **g)** Effect of o/n pre-treatment of A375 cells with recombinant IFN $\gamma$  or supernatant from 24-h NK/A375 cell co-culture on NK cells degranulation after 4-h co-culture (n=3). **h)** Degranulation of A375/NK cell supernatant-treated NK cells after 4-h co-culture with A375 cells. A375 cells were pre-treated or not with IFN $\gamma$  for 24 and 48 h, washed and incubated for 4 h in a fresh media. Supernatant was then collected and used for NK cell treatment during the co-culture with untreated A375 cells (n=3). **i)** Changes in ratios between WT vs B2M KO A375 cells after 24-h treatment with supernatant (sup) from 24-h NK/A375 co-culture, recombinant IFN $\gamma$  or TNF $\alpha$  in the absence of NK cells (n=3). **j)** Histograms showing the expression of MHC-I on different melanoma cell lines pre-treated or not for 12 h with IFN $\gamma$ . **k)** Degranulation of NK cells after 4-h co-culture with MHC-I sufficient (left) and MHC-I deficient (right) melanoma cell lines treated or not with IFN $\gamma$  o/n before the co-culture (n=3). **l)** Degranulation of NK cells after 4-h co-culture with A375 in the presence of NKG2D blocking mAb (n=6). **m)** Expression of MICA/B (left) or NKG2D ligands using NKG2D-Fc (right) on A375 cells

pre-treated or not with IFN $\gamma$  12 h. Statistical analysis was performed by two-tailed Student's *t* test (d, g, h, i, j, k, l), p-value \* $<0.05$ , \*\* $<0.01$ , \*\*\* $<0.001$ , \*\*\*\* $<0.0001$ .

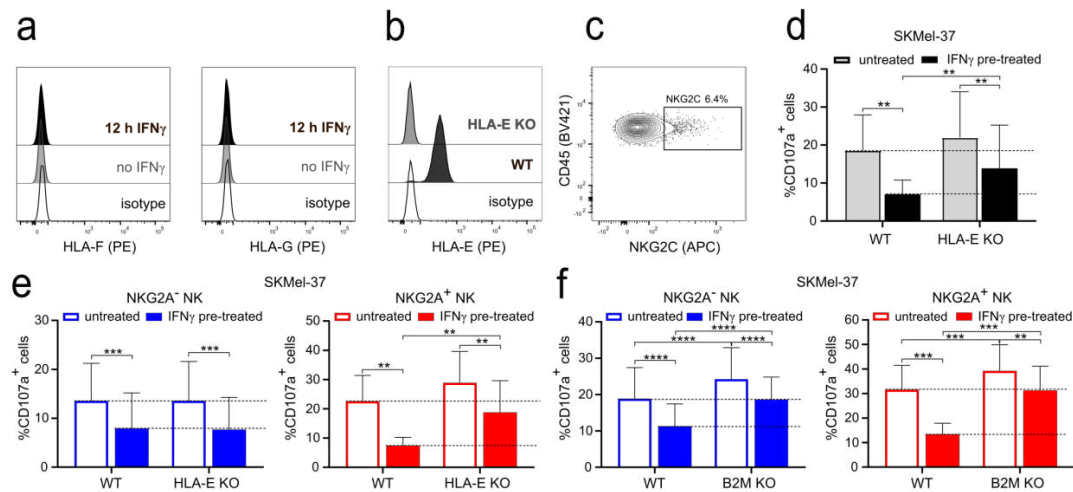

**Figure S2**

**a)** Expression of HLA-F and HLA-G on A375 cells pre-treated or not for 12 h with IFN $\gamma$ . **b)** Expression of HLA-E on WT and HLA-E KO A375 cells after 12 h of IFN $\gamma$  treatment. **c)** Representative dot plot showing the expression of NKG2C on NK cells. **d)** Degranulation of NK cells after 4-h co-culture with WT or HLA-E KO SKMEl-37 cells pre-treated or not with IFN $\gamma$  for 12 h before the co-culture (n=6). **e-f)** Degranulation of NKG2A $^{-}$  and NKG2A $^{+}$  NK cells after 4-h co-culture with WT, HLA-E KO or B2M KO SKMEl-37 cells pre-treated or not with IFN $\gamma$  for 12 h before the co-culture (n=6). Statistical analysis was performed by one-way ANOVA (multiple comparisons) test (d, e, f), p-value \* $<0.05$ , \*\* $<0.01$ , \*\*\* $<0.001$ , \*\*\*\* $<0.0001$ .

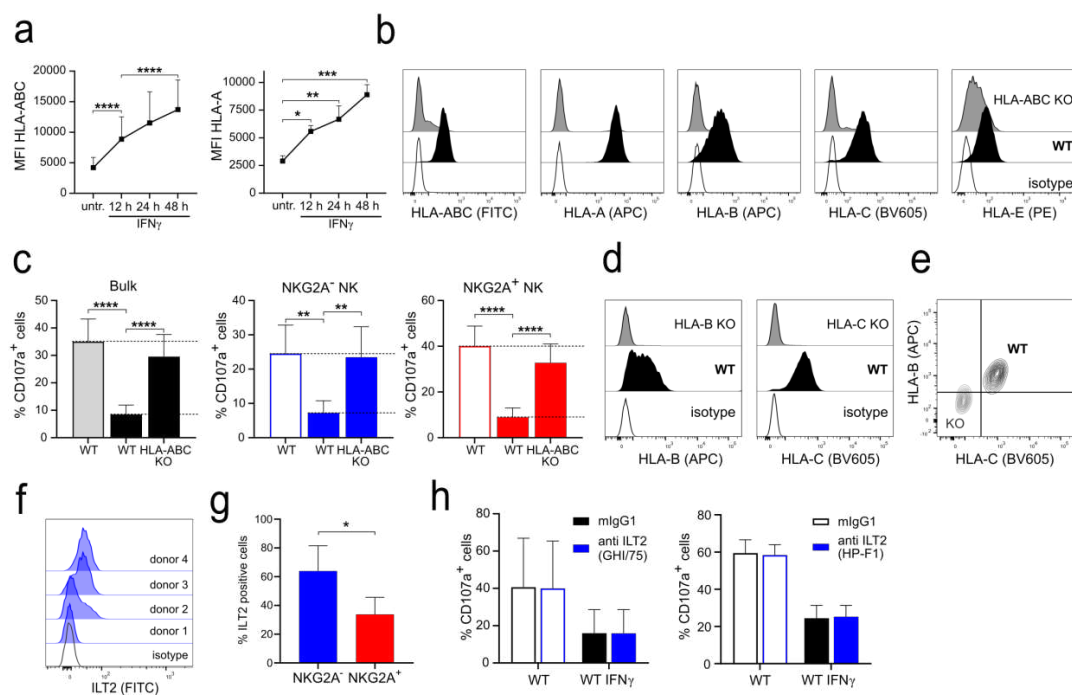**Figure S3**

**a)** Expression of HLA-ABC and HLA-A on A375 cells pre-treated or not for 12, 24 and 48 h (n=3-5). **b)** Expression of individual HLA molecules on HLA-ABC KO A375 cells pre-treated with IFN $\gamma$  for 12 h. **c)** Degranulation of bulk and NKG2A<sup>-</sup> and NKG2A<sup>+</sup> NK cells after 4-h co-culture with WT or HLA-ABC KO A375 cells pre-treated or not with IFN $\gamma$  for 12 h before the co-culture (n=6). **d)** Histogram showing the expression of HLA-B and HLA-C on WT and HLA-B KO or HLA-C KO A375 cells treated or not for 12 h with IFN $\gamma$ . **e)** Dot plot showing the expression of HLA-B and HLA-C on WT and HLA-BC dKO A375 cells treated for 12 h with IFN $\gamma$ . **f)** Representative histograms showing the expression of ILT2 on NK cells from 4 different donors. **g)** Expression of ILT2 on NKG2A<sup>-</sup> NK cell subsets (n=5). **h)**

Degranulation of NKG2A<sup>-</sup> NK cells after 4-h co-culture with A375 cells pre-treated or not with IFN $\gamma$  12 h before the co-culture in the presence of 2 different ILT2 blocking mAb (n=3-6). Statistical analysis was performed by one-way ANOVA (multiple comparisons) test (a, c, h) and two-tailed Student's *t* test (g), p-value \* $<0.05$ , \*\* $<0.01$ , \*\*\* $<0.001$ , \*\*\*\* $<0.0001$ .

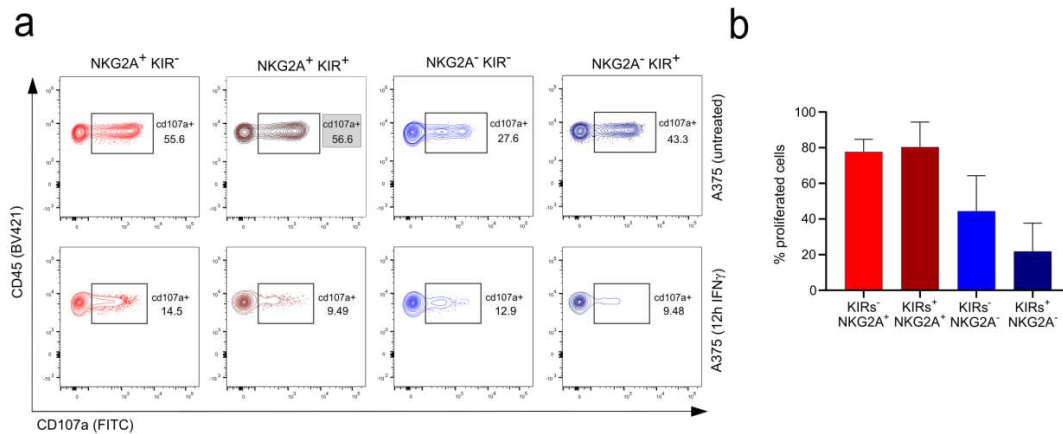**Figure S4**

**a)** Representative dot plots showing the gating of CD107a<sup>+</sup> cells on different NK cell subsets after 4-h co-culture with A375 pre-treated or not with IFN $\gamma$  12 h before co-culture. **b)** Proliferation of individual NK cell subsets from isolated NKG2A<sup>-</sup> NK cells after 6 d of culture in IL-2-containing media. NKG2A<sup>-</sup> NK cells were isolated by depletion of NKG2A<sup>+</sup> NK cells using NKG2A magnetic beads, stained with CTV and analysed at d 6 (n=3).

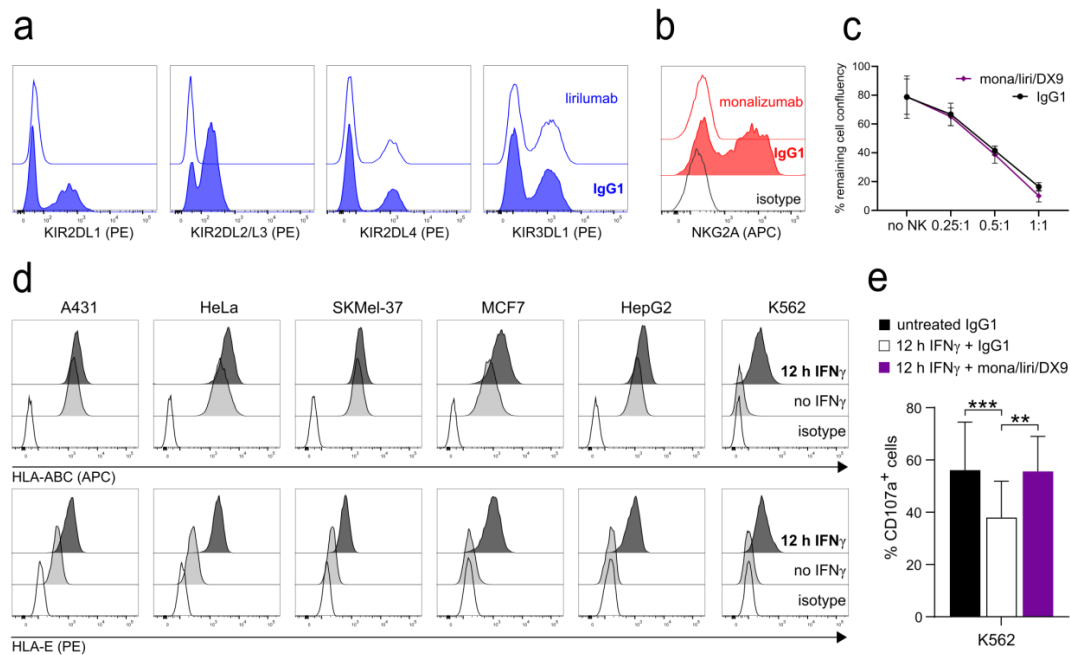

**Figure S5.**

**a)** Representative histograms showing the blocking effect of lirilumab mAb on individual KIRs expressed by most NK cell donors used in our assays. NK cells were incubated with 5 ug/ml of IgG1 or lirilumab for 15 min and stained with fluorochrome-conjugated mAbs against individual KIRs. **b)** Representative histograms showing the blocking effect of monalizumab on NKG2A detection on expanded NK cells. NK cells were incubated with 5 ug/ml of IgG1 or monalizumab for 15 min and stained with fluorochrome-conjugated NKG2A mAbs. **c)** Overall killing of B2M KO/WT cell mix (1:1) after 24-h co-culture with NKG2A<sup>+</sup> KIRs<sup>+</sup> NK cells in the presence of 5 ug/ml IgG1 or monalizumab + lirilumab + DX9 (n=3). **d)** Histograms showing the expression of HLA-ABC and HLA-E before and after 12-h IFN $\gamma$  treatment of different tumor cell lines. **e)** Degranulation of 9d IL-2-cultured NK cells after 4-h co-culture with K562 cell line pre-treated or not with IFN $\gamma$  for 12 h before co-culture in the presence of 5 ug/ml IgG1 or monalizumab + lirilumab + DX9 (n=6). Statistical analysis

was performed by one-way ANOVA (multiple comparisons) test (e), p-value \*\*<0.01, \*\*\*<0.001.



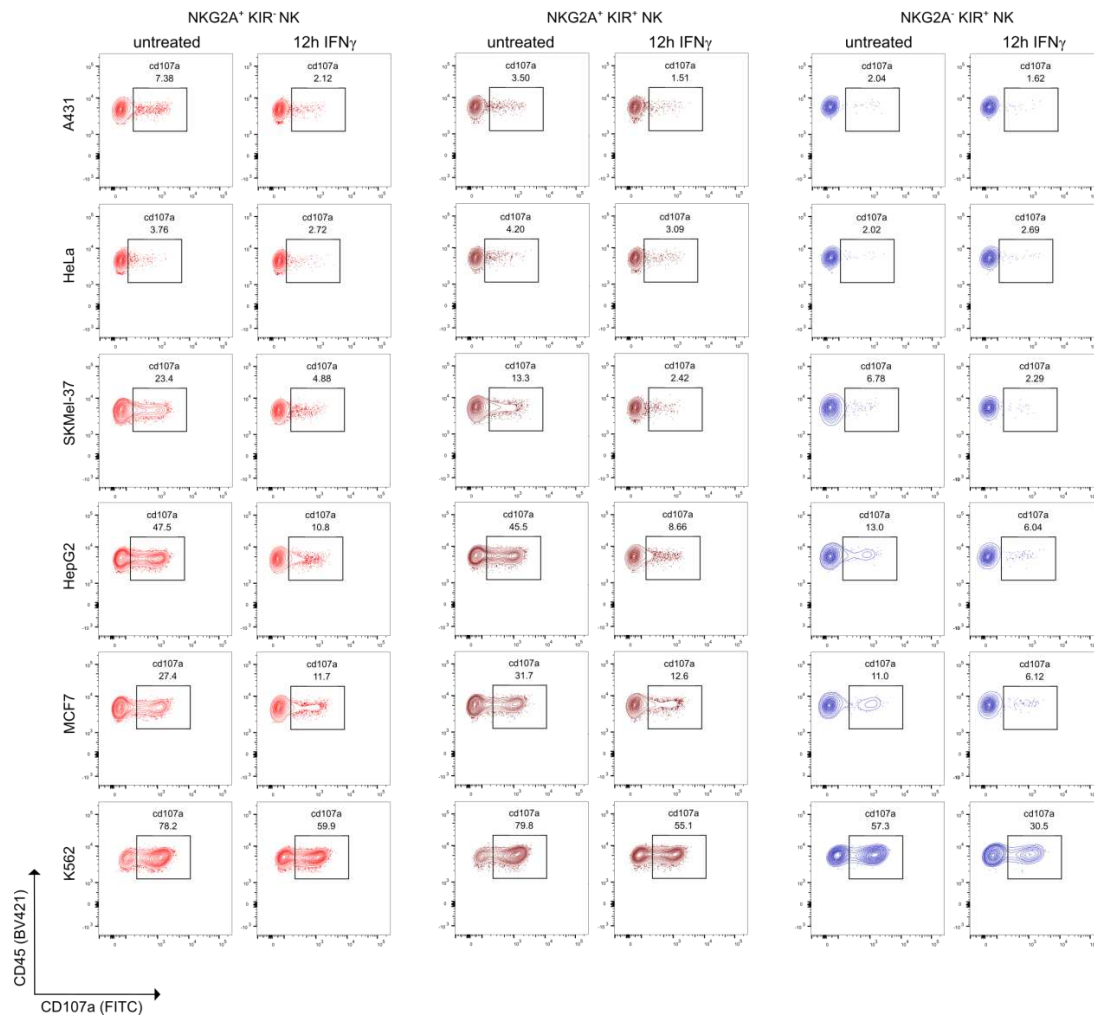**Figure S6.**

Representative dot plots showing the degranulation of 9d IL-2-cultured NKG2A/KIRs NK cell subsets against untreated or 12-h IFN $\gamma$ -pre-treated tumor cell lines.
